# Supplementary material for: Getting Recovery Right After Neck Dissection (GRRAND-F): mixed-methods feasibility study to design a pragmatic randomised controlled trial protocol
Source: HighWire-hosted journal article supplement (doi:10.1136/bmjopen-2020-045741), 2021-06-01
Supplement: bmjopen-2020-045741supp001_data_supplement.pdf [file bmjopen-2020-045741supp001_data_supplement.pdf]

Sponsor Logo

**CONSENT FORM (GRRAND-F STUDY)**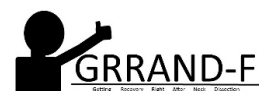

LOCAL TRUST LOGO

Name of Local Principal Investigator: \_\_\_\_\_

Screening ID:

|   |   |   |   |  |  |   |  |  |  |
|---|---|---|---|--|--|---|--|--|--|
| G | D | S | — |  |  | — |  |  |  |
|---|---|---|---|--|--|---|--|--|--|

**If you agree, please initial**

|                                                                                                                                                                                                                                                                                                                                                       |  |
|-------------------------------------------------------------------------------------------------------------------------------------------------------------------------------------------------------------------------------------------------------------------------------------------------------------------------------------------------------|--|
| 1. I confirm that I have read and understood the Information Leaflet dated 10 June 2020 Version 4.0. I have had the opportunity to consider the information, ask questions and have had these answered satisfactorily.                                                                                                                                |  |
| 2. I understand that my participation is voluntary and that I am free to withdraw at any time without giving any reason, and without my medical care or legal rights being affected.                                                                                                                                                                  |  |
| 3. I understand that relevant sections of my medical notes and data collected during the study may be looked at by individuals from the sponsor (XXXXXXXXXX), from regulatory authorities [and from the NHS Trust(s)], where it is relevant to me taking part in this research. I give permission for these individuals to have access to my records. |  |
| 4. I consent to the central study team holding a copy of my consent form and also my contact details so that they can contact me about the study. I understand these details will be held securely and destroyed after 5 years from the end of the study.                                                                                             |  |
| 5. I am aware that treatment sessions may be observed for quality assurance purposes.                                                                                                                                                                                                                                                                 |  |
| 6. I agree to my General Practitioner (GP) being informed of my participation in the study.                                                                                                                                                                                                                                                           |  |
| 7. I agree to be contacted for the purposes of follow up by the central GRRAND-F team who are based in XXXXXXXX.                                                                                                                                                                                                                                      |  |
| 8. I agree to take part in the GRRAND-F study.                                                                                                                                                                                                                                                                                                        |  |
| <b>OPTIONAL</b>                                                                                                                                                                                                                                                                                                                                       |  |
| 9. I agree to take part in the optional GRRAND-F study participant interviews.                                                                                                                                                                                                                                                                        |  |
| 10. I give permission that anonymous quotes from my interview may be used in the reporting of this study.                                                                                                                                                                                                                                             |  |
| 11. I give permission for the interview to be digitally-recorded.                                                                                                                                                                                                                                                                                     |  |
| 12. I agree to be contacted about ethically approved research studies for which I may be suitable. I understand that agreeing to be contacted does not oblige me to participate in any further studies.                                                                                                                                               |  |

Name of Participant

Date

Signature

Name of Person Taking Consent

Date

Signature

SupplementaryFile1.docx

IRAS ID: XXXXXXXX - REC reference: XXXXXX

Original consent to be filed in site file, a copy in patient notes, a copy to participant and an electronic copy for the central study office.

CI: XXXXXX
